# Supplementary material for: New Insight on the Formation of 2-Aminoacetophenone in White Wines
Source: MDPI journal article supplement (doi:10.3390/app13148472), 2023-07-22
Supplement: s1 [file s1]

## Article

# New Insight on the Formation of 2-Aminoacetophenone in White Wines

Tatjana Radovanović Vukajlović <sup>1</sup>, Christian Philipp <sup>2</sup>, Phillip Eder <sup>2</sup>, Martin Šala <sup>3</sup>, Vid Simon Šelih <sup>3</sup>, Andreja Vanzo <sup>4</sup>, Katja Šuklje <sup>4</sup>, Klemen Lisjak <sup>4</sup>, Melita Sternad Lemut <sup>1</sup>, Reinhard Eder <sup>2</sup> and Guillaume Antalick <sup>1,\*</sup>

<sup>1</sup> Wine Research Centre, University of Nova Gorica, Lanthieri Palace, Glavni trg 8, 5271 Vipava, Slovenia; tatjana.radovanovic@ung.si (T.R.V.); melita.sternad.lemut@ung.si (M.S.L.)

<sup>2</sup> Federal College and Research Institute for Oenology and Pomology, Wienerstraße 74, 3400 Klosterneuburg, Austria; christian.philipp@weinobst.at (C.P.); phillip.eder@weinobst.at (P.E.); reinhard.eder@weinobst.at (R.E.)

<sup>3</sup> National Institute of Chemistry, Hajdrihova 19, 1000 Ljubljana, Slovenia; martin.sala@ki.si (M.Š.); vid.selih@ki.si (V.S.Š.)

<sup>4</sup> Agricultural Institute of Slovenia, Department of Fruit Growing, Viticulture and Oenology, Hacquetova ulica 17, 1000 Ljubljana, Slovenia; andreja.vanzo@kis.si (A.V.); katja.suklje@kis.si (K.Š.); klemen.lisjak@kis.si (K.L.)

\* Correspondence: guillaume.antalick@ung.si

**Table S2.** Supplementary data 2: Chemical parameter of wines used for the experiments.

| Wine                         | A                             | B                             |
|------------------------------|-------------------------------|-------------------------------|
| Vintage                      | 2021                          | 2020                          |
| Varieties                    | Kerner/Welshriesling/Riesling | Chardonnay/Sauvignon/Riesling |
| Alcohol (% vol)              | 12.4                          | 12.5                          |
| pH                           | 3.32                          | 3.36                          |
| Total acidity (g/L)          | 5.5                           | 5.3                           |
| Volatile acidity (g/L)       | 0.2                           | 0.25                          |
| Residual sugar (g/L)         | 1.3                           | 1.9                           |
| Free SO <sub>2</sub> (mg/L)  | 22                            | 25                            |
| Total SO <sub>2</sub> (mg/L) | 122                           | 95                            |
