# Supplementary material for: New Insight on the Formation of 2-Aminoacetophenone in White Wines
Source: MDPI journal article supplement (doi:10.3390/app13148472), 2023-07-22
Supplement: s1 [file Table S1. Wine list for survey 1 and 2 with corresponding concentration in 2-AAP.xlsx]

## Sheet: Survey 1 (Austria)
Gruner Vetliner	Origin	2-AAP (µg/L)
	Niederösterreich, Rohrendorf	0.129938
	Niederösterreich, Dürnstein	0.104804
	Niederösterreich, Watzelsdorf	0.16868
	Niederösterreich, Weißenkirchen	0.128455
	Niederösterreich, Wetzsmannsthal	0.220685
	Niederösterreich, Krustetten	0.171086
	Niederösterreich, Auggenthal	0.253916
	Niederösterreich, Falkenstein	0.105671
	Niederösterreich, Senftenberg	0.144902
	Niederösterreich, Bad Pirawarth	0.144358
	Niederösterreich, Gallbrunn	0.19904
	Niederösterreich, Krems	0.161304
	Niederösterreich, Kamptal	0.169553
	Niederösterreich, Kamptal	0.242564
	Niederösterreich, Schwallenbach	0.191723
	Niederösterreich, Langenrohr	0.183264
	Niederösterreich, Röschitz	0.239327
	Niederösterreich, Kollnbrunn	0.315743
	Niederösterreich, Helenental	0.134764
	Niederösterreich, Haugsdorf	0.076415
Chardonnay	Niederösterreich, Pfaffstätten	0.190166
	Niederösterreich, Engabrunn	0.159463
	Niederösterreich, Hauskirchen	0.151123
	Niederösterreich, Petronell-Carnuntum	0.177844
	Niederösterreich, Untermarkersdorf	2.36806
	Niederösterreich, Bad Vöslau	0.155431
	Niederösterreich, Schönkirchen	0.259779
	Niederösterreich, Glaubendorf	0.123333
	Niederösterreich, Pernersdorf	0.154404
	Niederösterreich, Hartberg/Penzendorf	0.413201
	Niederösterreich, Stoizendorf	0.135882
	Niederösterreich, Mödling	0.921684
	Niederösterreich, Kleinhadersdorf	0.71515
	Niederösterreich, Obritz	0.230988
	Niederösterreich, Kalladorf	0.0986008
	Niederösterreich, Poysdorf	0.111077
Riesling	Niederösterreich, Weißenkirchen	2.5115
	Niederösterreich, Weißenkirchen	1.54402
	Niederösterreich, Gr. Riedenthal	4.00566
	Niederösterreich, Maissau	0.348196
	Niederösterreich, Herzogenburg	2.56519
	Niederösterreich, Kollnbrunn	1.61882
	Niederösterreich, Niedersulz	1.81998
	Niederösterreich, Guntramsdorf	2.27032
	Niederösterreich, Theyern	1.80085
	Niederösterreich, Sachsendorf	3.29922
	Niederösterreich, Weißenkirchen	2.17684
	Niederösterreich, Hagenbrunn	1.90935
	Niederösterreich, Rohrendorf	2.09095
	Niederösterreich, Krems	1.55209
	Niederösterreich, Weißenkirchen	4.36584
	Niederösterreich, Schrazzenthal	2.4405
	Niederösterreich, Bad Pirawarth	2.02917
	Niederösterreich, Laxenburg	4.39493
	Niederösterreich, Karnabrunn	1.09096
	Niederösterreich, Guntramsdorf	1.69277
	Niederösterreich, Mistelbach	0.496941
	Niederösterreich, Langenlois	4.35063
	Niederösterreich, Krustetten	0.849924
	Niederösterreich, Falkenstein	0.494327
	Niederösterreich, Krustetten/Paudorf	1.33552
Muscat Ottonel	Niederösterreich, Hagenbrunn	3.10515
	Niederösterreich, Enzersfeld	3.39194
	Niederösterreich, Baden	1.1494
	Niederösterreich, Fels am Wagram	1.31924
	Niederösterreich, Stetteldorf am Wagram	3.50813
	Niederösterreich, Rohrendorf	4.5481
	Niederösterreich, Weißenkirchen	2.8499
	Niederösterreich, Wölbling	4.2851
	Niederösterreich, Ebenthal	1.99069
	Niederösterreich, Leobendorf	4.18117
	Niederösterreich, Krems	3.89405
	Niederösterreich, Baden	1.98761
	Niederösterreich, Perchtoldsdorf	10.0021
	Niederösterreich, Ritzental	3.16862
	Niederösterreich, Matzen	3.46374
	Niederösterreich, Ebersdorf	6.16179
	Niederösterreich, Herrnbaumgarten	1.74674
	Niederösterreich, Langenlois	3.60345
	Niederösterreich, Pfaffstätten	9.22773
	Niederösterreich, Göttlesbrunn	8.03369
	Niederösterreich, Krems/Stein	3.73693
	Niederösterreich, Spital	5.49447
	Niederösterreich, Schönberg	6.02554
	Niederösterreich, Bad Vöslau	9.47582
	Niederösterreich, Zellerndorf	1.54721

## Sheet: Survey 2 (Slovenia_Croatia)
Variety	Country	Region	vintage	2-AAP (µg/L)
	Slovenia	Vipava valley	2018	0.256861
	Slovenia	Vipava valley	2020	0.181687
	Slovenia	Vipava valley	2020	0.161357
	Slovenia	Vipava valley	2018	0.877547
Zelen	Slovenia	Vipava valley	2020	0.172515
	Slovenia	Vipava valley	2019	0.255951
	Slovenia	Vipava valley	2020	0.262506
	Slovenia	Vipava valley	2020	0.653098
	Slovenia	Vipava valley	2020	0.100691
	Slovenia	Stajerska	2019	0.12674
	Slovenia	Stajerska	2018	0.885615
	Slovenia	Stajerska	2019	5.88019
Chardonnay	Slovenia	Stajerska	2019	0.660791
	Slovenia	Vipava valley	2020	0.117329
	Slovenia	Vipava valley	2019	0.0396468
	Slovenia	Goriska Brda	2019	0.480435
	Slovenia	Stajerska	2019	2.02864
	Slovenia	Stajerska	2018	3.55129
	Slovenia	Stajerska	2019	4.697
	Slovenia	Stajerska	2016	4.29234
Riesling	Slovenia	Stajerska	2018	3.54763
	Slovenia	Stajerska	2019	4.73868
	Slovenia	Stajerska	2017	9.15077
	Slovenia	Stajerska	2017	6.7424
	Slovenia	Stajerska	2019	1.86678
	Slovenia	Stajerska	2019	1.18246
	Slovenia	Stajerska	2020	2.85999
	Slovenia	Bela Krajina	2019	7.41082
	Slovenia	Stajerska	2020	2.11499
	Slovenia	Stajerska	2019	18.2173
	Slovenia	Stajerska	2020	15.3201
	Slovenia	Stajerska	2020	10.4685
Muscat Ottonel	Slovenia	Stajerska	2020	5.85933
	Slovenia	Dolenjska	2018	3.96947
	Slovenia	Dolenjska	2019	11.4549
	Slovenia	Stajerska	2018	15.7237
	Slovenia	Vipava valley	2020	6.40862
	Slovenia	Vipava valley	2020	4.45538
	Slovenia	Stajerska	2020	0.308758
	Croatia	Slavonia	2020	0.173312
Welshriesling	Croatia	Slavonia	2020	0.159576
	Croatia	Slavonia	2020	0.0974562
	Croatia	Slavonia	2020	0.126427
	Croatia	Slavonia	2020	0.710259
